# Supplementary material
Source: PubMed Central journal article supplement (PMC3897223)
Supplement: NIHMS459369-supplement-1_si_001.pdf [file NIHMS459369-supplement-1_si_001.pdf]

## Supporting Information for:

### Further Characterization of Cys-Type and Ser-Type Anaerobic Sulfatase Maturing Enzymes Suggests a Commonality in Mechanism of Catalysis

Tyler L. Grove<sup>‡</sup>, Jessica H. Ahlum<sup>‡</sup>, Rosie M. Qin<sup>§</sup>, Nicholas D. Lanz<sup>§</sup>, Matthew I. Radle<sup>‡</sup>, Carsten Krebs<sup>\*‡§</sup>, and Squire J. Booker<sup>\*‡§</sup>

**Figure S1.** Sequence alignment of anSMEcpe cloned from *C. perfringens* (ATCC #13124D-5) and the gene from *C. perfringens* strain 13 (accession #BAB80341). Differences between the sequence determined herein and the sequence in the database are highlighted in red.

**Figure S2.** EPR of M□ssbauer samples. anSMEcpe AI (red trace), anSMEcpe RCN (black trace), anSMEcpe<sub>C15A/C19A/C22A</sub> AI (green trace), and anSMEcpe<sub>C15A/C19A/C22A</sub> RCN (blue trace). Spectra were collected on a Bruker ESP-300 X-Band EPR spectrometer with the following parameters: frequency, 9.51 GHz; temperature, 13 K; power, 0.101 mW; and modulation amplitude, 10 Gauss. Spin quantification was performed by comparing the double integral of the obtained signal to that of a 1 mM Cu(II)-EDTA standard collected under identical conditions.

**Figure S3.** LC-MS analysis of anSMEcpe assay. The assay was conducted as described in Materials and Methods using **Kp18Cys** as the substrate, **Kp9Ser** as an internal standard, and dithionite (4.5 mM) as the required reductant. Green (t=0); Red (t=30 min); Black (t=5, 10, and 20 min).

**Figure S4.** Turnover of WT RCN anSMEcpe with **Cp18Cys**. **A)** Time-dependent formation of 5'-dA (black triangles) and depletion of **Cp18Cys** (red squares) in the presence of dithionite. Reaction mixtures contained 4 μM anSMEcpe, 1 mM SAM, 1 mM **Cp18Cys**, and 3 mM dithionite. The data are the averages of two independent trials, and error bars denote one standard deviation.  $V_{\max}/[E_T]$  values for 5'-dA formation and peptide consumption are  $4.50 \pm 0.052 \text{ min}^{-1}$  and  $1.91 \pm 0.259 \text{ min}^{-1}$ , respectively. **B)** Time-dependent formation of 5'-dA (black triangles) and depletion of **Cp18Cys** (red squares) in the presence of the Flv/Flx/NADPH reducing system. Reaction mixtures contained 40 μM anSMEcpe, 1 mM SAM, 1 mM **Cp18Cys**, 50 μM Flv, 15 μM Flx, and 2 mM NADPH. The data are the averages of two independent trials, and error bars denote one standard deviation.  $V_{\max}/[E_T]$  values for 5'-dA formation and peptide consumption are  $0.22 \pm 0.003 \text{ min}^{-1}$  and  $0.21 \pm 0.032 \text{ min}^{-1}$ , respectively.

**Figure S5.** Time-dependent formation of 5'-dA (black triangles) and **Kp18FGly** (red squares) in the presence of Kp18SeCys. Reaction mixtures contained 40 μM anSMEcpe, 1 mM SAM, 0.5 mM **Kp18SeCys**, 50 μM Flv, 15 μM Flx, and 2 mM NADPH.  $V_{\max}/[E_T]$  values for 5'-dA and **Kp18FGly** formation are  $0.053 \text{ min}^{-1}$  and  $0.032$ , respectively.

**Figure S6.** Low-temperature X-Band EPR of Flv• and anSMEcpe during turnover. Reaction mixtures contained 100 μM anSMEcpe, 2 mM SAM, 2 mM **Kp18Cys** and 204 μM Flv• ( $\epsilon_{580}=4.57 \text{ mM}^{-1} \text{ cm}^{-1}$ ) at 13 K at 1 min (green), 15 min (red), and 30 min (black). Spectra were collected on a Bruker ESP-300 X-Band EPR spectrometer under the following conditions:

frequency, 9.51 GHz; temperature, 13 K; power, 0.101 mW; and modulation amplitude, 10 Gauss.

**Figure S7.** Correlation of spectral changes and product formation during AtsB turnover with **Kp18Cys**. **A)** X-Band EPR (77 K) spectra of a reaction mixture containing 150  $\mu\text{M}$  AtsB, 1 mM SAM, 1 mM **Kp18Ser**, 75  $\mu\text{M}$  Flv<sub>ox</sub>, and 75  $\mu\text{M}$  Flv• at 1 min (red), 15 min (green), and 30 min (black). Spectra were recorded as described in Materials and Methods. **B)** Time-dependent quantification of Flv• (open circles) and 5'-dA (closed triangles). The black line is a fit of the 5'-dA data to an equation describing a burst phase followed by a steady-state linear phase.

**Figure S8.** Stereochemical designation of threonine and *allo*-threonine.

**Figure S9.** MALDI MS analysis of a WT RCN anSMEcpe reaction with **Kp18Thr** (**A**), or **Kp18alloThr** (**B**). Aliquots removed from the reaction at 0 min (black trace) and 10 min (red trace) were derivatized with DNPH as described in Materials and Methods. Spectra were recorded as previously described <sup>(1)</sup>.

**Figure S10.** MALDI MS analysis of a WT RCN AtsB reaction with **Kp18Thr** (**A**), or **Kp18alloThr** (**B**). Aliquots removed from the reaction at 0 min (black trace) and 10 min (red trace) were derivatized with DNPH as described in Materials and Methods. Spectra were recorded as previously described <sup>(1)</sup>.

**Figure S11.** UV-vis spectra of AI AtsB C127A and C245A. AI AtsB C127A (11.3  $\mu\text{M}$ ; solid black trace, left axis) contained  $9.8 \pm 0.1$  irons and  $9.6 \pm 0.5$  sulfides per polypeptide. AI AtsB C245A variant (6.2  $\mu\text{M}$ ; dashed red trace, right axis) contained  $12.0 \pm 1.1$  irons and  $15.0 \pm 0.3$  sulfides per polypeptide. The  $A_{395}/A_{280}$  ratio for both is 0.38.

**Figure S12.** UV-vis spectrum of AI AtsB C291A. The protein (6.4  $\mu\text{M}$ ), contained  $6.7 \pm 0.1$  irons and  $5.6 \pm 0.6$  sulfides per polypeptide. The  $A_{405}/A_{280}$  ratio was 0.39.

**Figure S13.** UV-vis spectrum of AI (solid line) and RCN (dashed line) anSMEcpe C276A. AI anSMEcpe C276A (4  $\mu\text{M}$ , solid line, left Y-axis) and RCnN anSMEcpe C276A (8.4  $\mu\text{M}$ , dotted line, right Y-axis). The  $A_{410}/A_{280}$  ratios of AI and RCN proteins were 0.36 and 0.45, respectively.

**Figure S14.** UV-vis of Flv• added to electron counting reaction with anSMEcpe.

---

Table S1: List of primers for site-directed mutagenesis of AtsB

| Primer                | Sequence                                              |
|-----------------------|-------------------------------------------------------|
| AtsB C127A Forward    | 5'-gctgatcaacgacgcatgg <u>GCC</u> cgactgttccgcg-3'    |
| AtsB C127A Reverse    | 5'-cgcggaacagtcg <u>GGC</u> ccatgcgtcgttgatcagc-3'    |
| AtsB C245A Forward    | 5'-ggcggaagcgc <u>GCC</u> gatagagggcg-3'              |
| AtsB C245A Reverse    | 5'-cgccctctatc <u>GGC</u> gcgcttccgcc-3'              |
| AtsB C270A Forward    | 5'-ccagcggcagc <u>GCC</u> gtgcacagcg-3'               |
| AtsB C270A Reverse    | 5'-cgctgtgcac <u>GGC</u> gctgccgctgg-3'               |
| AtsB C276A Forward    | 5'-cgtgcacagcgcccgc <u>GCC</u> ggcagcaacctgg-3'       |
| AtsB C276S Reverse    | 5'-ccaggttgctgcc <u>GGC</u> gcgggcgctgtgcacg-3'       |
| AtsB C276S Forward    | 5'-cgtgcacagcgcccgc <u>TCC</u> ggcagcaacctgg-3'       |
| AtsB C276A Reverse    | 5'-ccaggttgctgcc <u>GGA</u> gcgggcgctgtgcacg-3'       |
| AtsB C291A Forward    | 5'-ggacagctctacgcc <u>GCC</u> gaccacctgatcaacg-3'     |
| AtsB C291A Reverse    | 5'-cgttgatcaggtggtc <u>GGC</u> ggcgtagagctgtcc-3'     |
| AtsB C331A Forward    | 5'-gcgccgcgaa <u>GCC</u> cagacttgctcgg-3'             |
| AtsB C331A Reverse    | 5'-ccgagcaagtctg <u>GGC</u> ttcgcggcgc-3'             |
| AtsB C334A Forward    | 5'-ccgcgaatgccagact <u>GCC</u> tcggtaaaaatgg-3'       |
| AtsB C334A Reverse    | 5'-ccattttaccga <u>GGC</u> agtctggcattcgcgg-3'        |
| AtsB C340A Forward    | 5'-cggtaaaaatggtc <u>GCC</u> cagggcggtgccc-3'         |
| AtsB C340A Reverse    | 5'-gggcagccgcctg <u>GGC</u> gaccattttaccg-3'          |
| AtsB C344A Forward    | 5'-ggtctgccagggcggc <u>GCC</u> ccggcgcatctcaacgccg-3' |
| AtsB C344A Reverse    | 5'-cggcgttgagatgcgccgg <u>GGC</u> gccgccctggcagacc-3' |
| AtsB C357A Forward    | 5'-ggcaacaaccgcctc <u>GCC</u> ggaggetactaccgc-3'      |
| AtsB C357A Reverse    | 5'-gcggtagtagcctcc <u>GGC</u> gaggcggttgtgcc-3'       |
| anSMEcpe C276 Forward | 5'-ggagtgtttatcctGCTgattttatgttttagataaatgg-3'        |
| anSMEcpe C276 Reverse | 5'-ccatttatctaaacataaaaatcAGCaggataaacactcc-3'        |

---

Table S2: Retention times and monitored  $m/z$  values for Detection Method 1

|                 | Retention Time | Parent Ion* | Product Ion 1 <sup>†</sup> | Product Ion 2 <sup>†</sup> |
|-----------------|----------------|-------------|----------------------------|----------------------------|
| 5'-dA           | 4.7 min        | 252.1 (90)  | 136 (13)                   | 119 (50)                   |
| Tryptophan (IS) | 6.2 min        | 188 (130)   | 146.1 (10)                 | 118 (21)                   |

\*Respective fragmentor voltages are in parenthesis.

<sup>†</sup>Respective collision energies are in parenthesis.

Table S3: Retention times and monitored  $m/z$  values for Detection Method 2

| Substrate            | Retention Time | Parent Ion*  | Product Ion 1 <sup>†</sup> | Product Ion 2 <sup>†</sup> |
|----------------------|----------------|--------------|----------------------------|----------------------------|
| Kp9Ser (IS)          | 1.4 min        | 474.4 (180)  | 719.3 (15)                 | 561.3 (11)                 |
| Kp18FGly             | 3.9 min        | 1000.7 (180) | 905.9 (12)                 | 404.2 (20)                 |
| Kp18Ser              | 4.0 min        | 1001.7 (180) | 906.9 (12)                 | 404.2 (12)                 |
| Kp18Cys              | 4.4 min        | 1009.9 (180) | 1727.8 (12)                | 914.9 (12)                 |
| Kp18SeCys            | 4.8 min        | 1033.1 (180) | 1414.6 (0)                 | 291.1 (24)                 |
| Cp18Cys              | 4.8 min        | 955.3 (180)  | 477.2 (16)                 | 421.2 (8)                  |
| Kp18Thr              | 4.1 min        | 1008.7 (180) | 1059.6 (18)                | 914 (14)                   |
| Kp18 <i>allo</i> Thr | 3.9 min        | 1008.7 (180) | 1059.6 (18)                | 914 (14)                   |

\*Respective fragmentor voltages are in parenthesis.

<sup>†</sup>Respective collision energies are in parenthesis.

## Figure S1

|          |     |                                                                               |     |
|----------|-----|-------------------------------------------------------------------------------|-----|
| AnSMEcpe | 1   | ATGCCACCATTAAGTTTGCTTATTAAGCCAGCTTCTAGTGG                                     | 41  |
| BAB80341 | 1   | ATGCCACCATTAAGTTTGCTTATTAAGCCAGCTTCTAGTGG                                     | 41  |
| AnSMEcpe | 42  | ATGTAATTTAAAATGCACTTATTGTTTTTATCATTCTTTAA                                     | 82  |
| BAB80341 | 42  | ATGTAATTTAAAATGCACTTATTGTTTTTATCATTCTTTAA                                     | 82  |
| AnSMEcpe | 83  | GTGATAATAGAAATGTTAAGAGCTA <b>C</b> GGAATTATGAGAGAT                            | 123 |
| BAB8034  | 83  | GTGATAATAGAAATGTTAAGAGCTA <b>T</b> GGAATTATGAGAGAT                            | 123 |
| AnSMEcpe | 124 | GAAGTTTTAGAAAGCATGGT <b>C</b> AAAAGGGTTTTGAATGAAGC                            | 164 |
| BAB8034  | 124 | GAAGTTTTAGAAAGCATGGT <b>T</b> AAAAGGGTTTTGAATGAAGC                            | 164 |
| AnSMEcpe | 165 | <b>T</b> AATGG <b>A</b> CATTG <b>C</b> AGTTTTGCTTTTT <b>C</b> AGGGAGGAGAACCTA | 205 |
| BAB80341 | 165 | <b>T</b> GATGG <b>C</b> CATTG <b>T</b> AGTTTTGCTTTTT <b>C</b> AGGGAGGAGAACCTA | 205 |
| AnSMEcpe | 206 | CCTTAGCAGGATTAGAATTTTTT <b>G</b> AAA <b>A</b> GTTAATGGAGCTT                   | 246 |
| BAB80341 | 206 | TCTTAGCAGGATTAGAATTTTTT <b>G</b> AAA <b>G</b> GTTAATGGAGCTT                   | 246 |
| AnSMEcpe | 247 | CAGAG <b>A</b> AAACATAATTATAAAAATTTAAAATATATAATAG                             | 287 |
| BAB80341 | 247 | CAGAG <b>G</b> AAACATAATTATAAAAATTTAAAATATATAATAG                             | 287 |
| AnSMEcpe | 288 | TTTGCAAACCAATGGAAC <b>T</b> TTAATAGATGAAAGTTGGGCAA                            | 328 |
| BAB80341 | 288 | TTTGCAAACCAATGGAAC <b>T</b> TTAATAGATGAAAGTTGGGCAA                            | 328 |
| AnSMEcpe | 329 | AGTTTTTAAGTGAAAATAAATTTCTTGTGGGACTATCTATG                                     | 369 |
| BAB80341 | 329 | AGTTTTTAAGTGAAAATAAATTTCTTGTGGGACTATCTATG                                     | 369 |
| AnSMEcpe | 370 | GATGGACCTAAGGAAATACACAATTTAAATAGAAAAGATTG                                     | 410 |
| BAB80341 | 370 | GATGGACCTAAGGAAATACACAATTTAAATAGAAAAGATTG                                     | 410 |
| AnSMEcpe | 411 | TTGTGGTTTTAGATACCTTTAGTAAGGTAGAAAGGGCAGCGG                                    | 451 |
| BAB80341 | 411 | TTGTGGTTTTAGATACCTTTAGTAAGGTAGAAAGGGCAGCGG                                    | 451 |
| AnSMEcpe | 452 | AGTTATTTAAAAGTATAAGGTTGAATTTAATATATTATGC                                      | 492 |
| BAB80341 | 452 | AGTTATTTAAAAGTATAAGGTTGAATTTAATATATTATGC                                      | 492 |
| AnSMEcpe | 493 | GTTGTGACCTCTAATACAGCTAGGCATGTAAATAAA <b>G</b> TATA                            | 533 |
| BAB80341 | 493 | GTTGTGACCTCTAATACAGCTAGGCATGTAAATAAA <b>A</b> TATA                            | 533 |
| AnSMEcpe | 534 | <b>T</b> AAATATTTTAAAGGAAAAAGATTTTAAATTTCTTCAATTTA                            | 574 |
| BAB80341 | 534 | <b>T</b> AGATATTTTAAAGGAAAAAGATTTTAAATTTCTTCAATTTA                            | 574 |
| AnSMEcpe | 575 | TAAATTGTCTTGACCCATTGTACGAGGAAAA <b>A</b> GGTAAATAT                            | 615 |
| BAB80341 | 575 | TAAATTGTCTTGACCCATTGTACGAGGAAAA <b>G</b> GGTAAATAT                            | 615 |
| AnSMEcpe | 616 | AATTATTCTTTAA <b>A</b> GCC <b>A</b> AGGATTATACTAAGTTTTTAA                     | 656 |
| BAB80341 | 616 | AATTATTCTTTAA <b>A</b> ACC <b>A</b> AGGATTATACTAAGTTTTTAA                     | 656 |
| AnSMEcpe | 657 | GAATTTATT <b>C</b> GACTTT <b>T</b> TGGTATGAAGATTTTCTAAATGGAA                  | 697 |
| BAB80341 | 657 | GAATTTATT <b>T</b> GACTTT <b>G</b> TGGTATGAAGATTTTCTAAATGGAA                  | 697 |
| AnSMEcpe | 698 | ATAGAGTAAGCATTAGATATTTTTGATGGTTTA <b>T</b> TAGAAACA                           | 738 |

|          |      |                                            |      |
|----------|------|--------------------------------------------|------|
| BAB80341 | 698  | ATAGAGTAAGCATTAGATATTTTGATGGTTTACTAGAAACA  | 738  |
| AnSMEcpe | 739  | ATTTTATTAGGAAAGTCATCATCTTGTGGAATGAATGGGAC  | 779  |
| BAB80341 | 739  | ATTTTATTAGGAAAGTCATCATCTTGTGGAATGAATGGGAC  | 779  |
| AnSMEcpe | 780  | ATGTACCTGTCAGTTTGTGGAAAGTGATGGGAGTGTTT     | 820  |
| BAB80341 | 780  | ATGTACCTGTCAGTTTGTGGAAAGTGATGGGAGTGTTT     | 820  |
| AnSMEcpe | 821  | ATCCTTGTGATTTTTATGTTTTAGATAAATGGAGACTAGGC  | 861  |
| BAB80341 | 821  | ATCCTTGTGATTTTTATGTTTTAGATAAATGGAGACTAGGC  | 861  |
| AnSMEcpe | 862  | AACATACAGGATATGACAATGAAAGAATTATTTGAAACCAA  | 902  |
| BAB80341 | 862  | AACATACAGGATATGACAATGAAAGAATTATTTGAAACAAA  | 902  |
| AnSMEcpe | 903  | TAAAAATCATGAGTTTATAAAATTATCAATTTAAAGTTCATG | 943  |
| BAB80341 | 903  | TAAAAATCATGAGTTTATAAAATCATCCTTTAAAGTTCATG  | 943  |
| AnSMEcpe | 944  | AAGAATGC AAAAAGTGCAAGTGGTTTAGACTTTGTAAAGGT | 984  |
| BAB80341 | 944  | AAGAATGT AAAAAGTGCAAGTGGTTTAGACTTTGTAAAGGT | 984  |
| AnSMEcpe | 985  | GGATGTAGAAGGTGCAGAGATTCAAAGGAAGATTCAGCTTT  | 1025 |
| BAB80341 | 985  | GGATGTAGAAGGTGCAGAGATTCAAAGGAAGACTCAGACTT  | 1025 |
| AnSMEcpe | 1026 | AGAGTTAAACTACTATTGTCAAAGCTACAAGGAATTCTTTG  | 1066 |
| BAB80341 | 1026 | AGAGTTAAACTACTATTGCAAAGTTACAAGGAATTCTTTG   | 1066 |
| AnSMEcpe | 1067 | AATATGCCTTTCCAAGGTTAATAAATGTTGCCAACAATATT  | 1107 |
| BAB80341 | 1067 | AATATGCCTTTCCAAGGTTAATAAATGTTGCCAACAATATT  | 1107 |
| AnSMEcpe | 1108 | AAATCGGATCCGAATTCGAGCTCCGTCGACAAGCTTGCGGC  | 1148 |
| BAB80341 | 1108 | AAATAA                                     | 1113 |
| AnSMEcpe | 1149 | CGCACTCGAGCACCACCACCACCACCCTGAGATCCGGCTG   | 1189 |
| BAB80341 | 1114 |                                            | 1113 |
| AnSMEcpe | 1190 | CTAACAAAGCCCGAA                            | 1204 |
| BAB80341 | 1114 |                                            | 1113 |

Figure S2

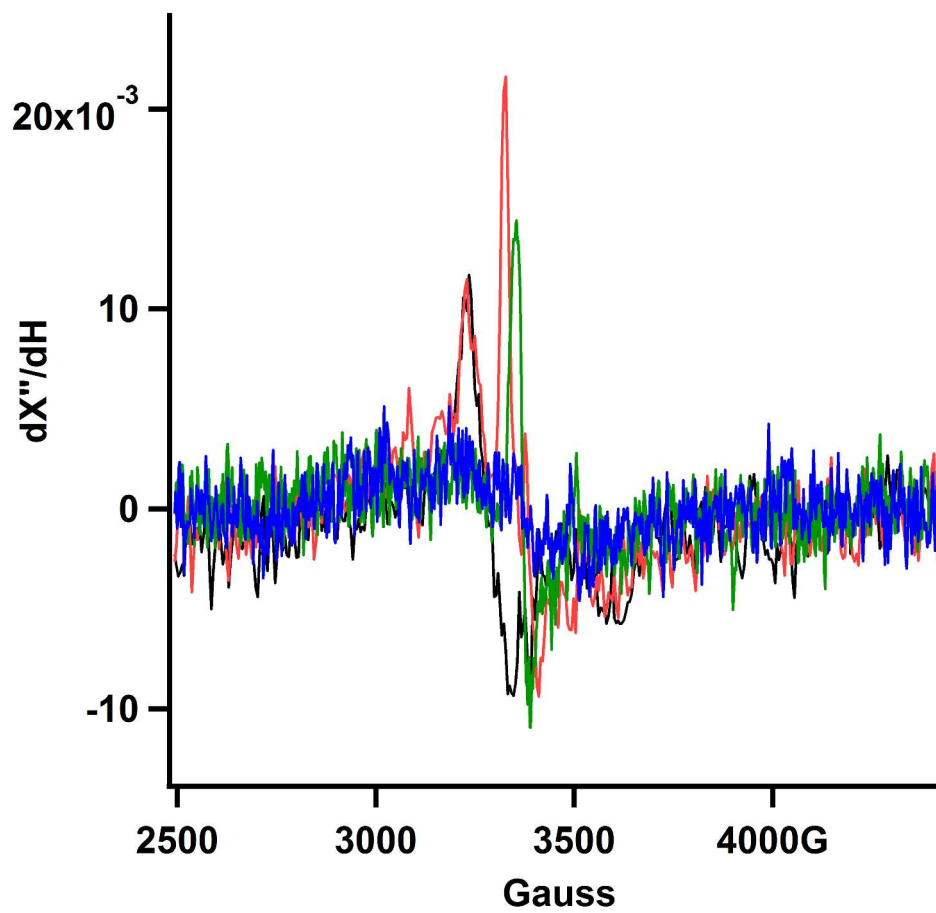

Figure S3

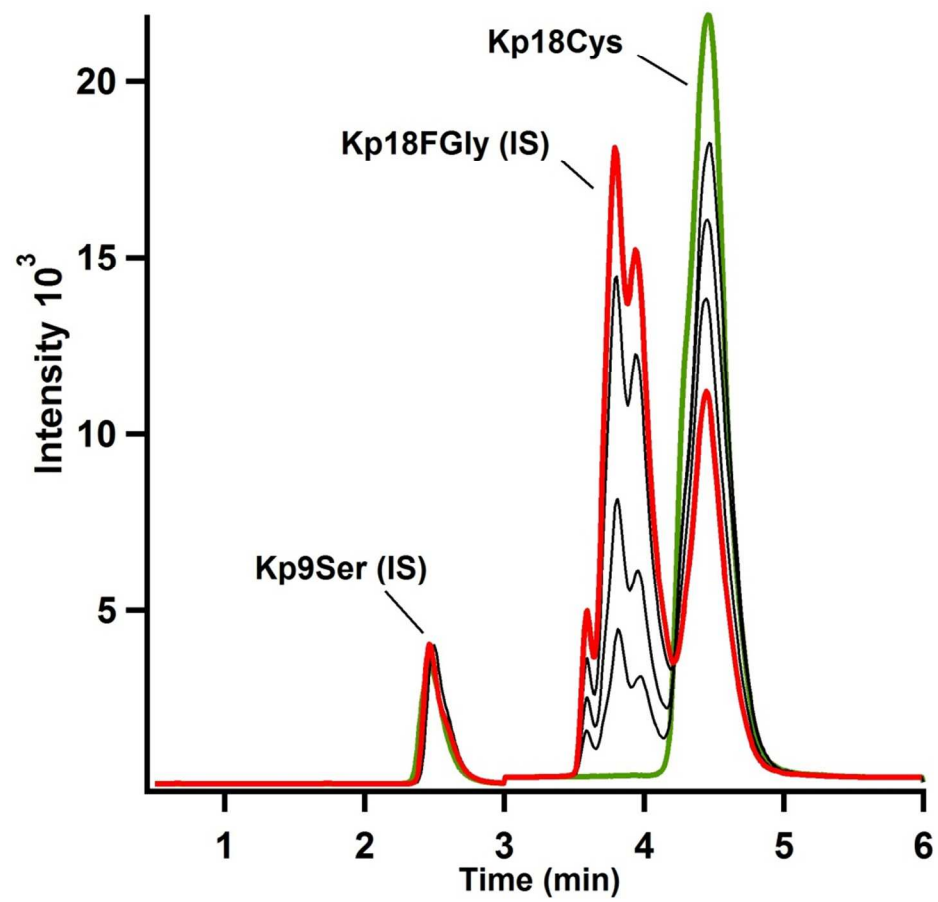



Figure S4.

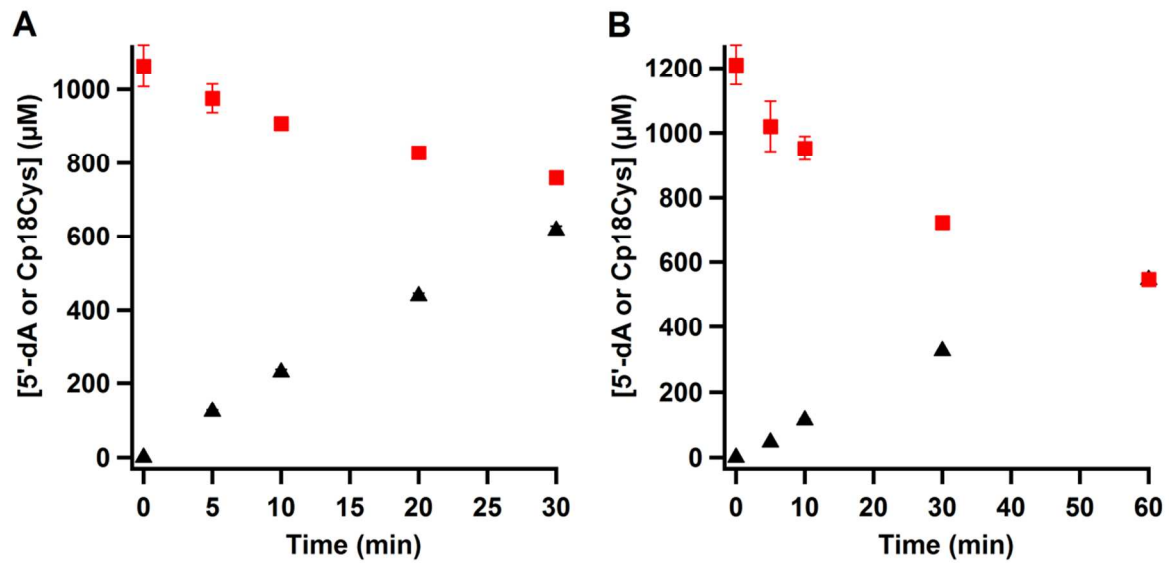

Figure S5.

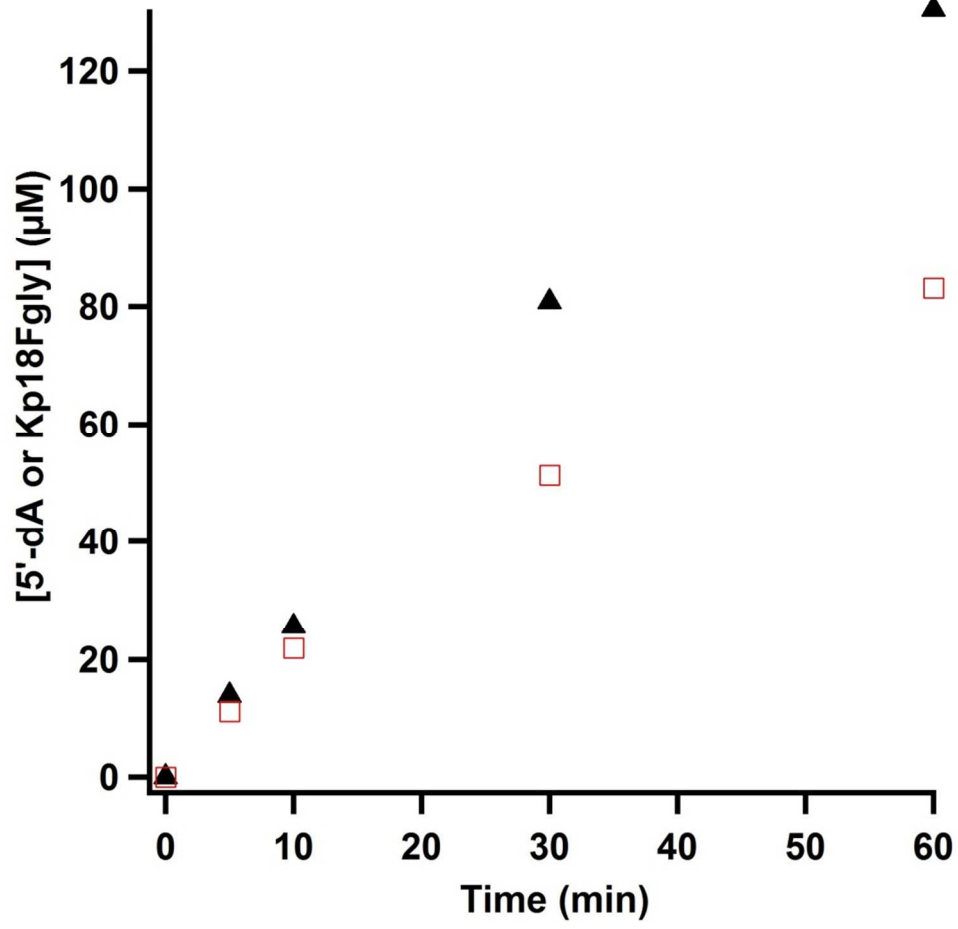

Figure S6.

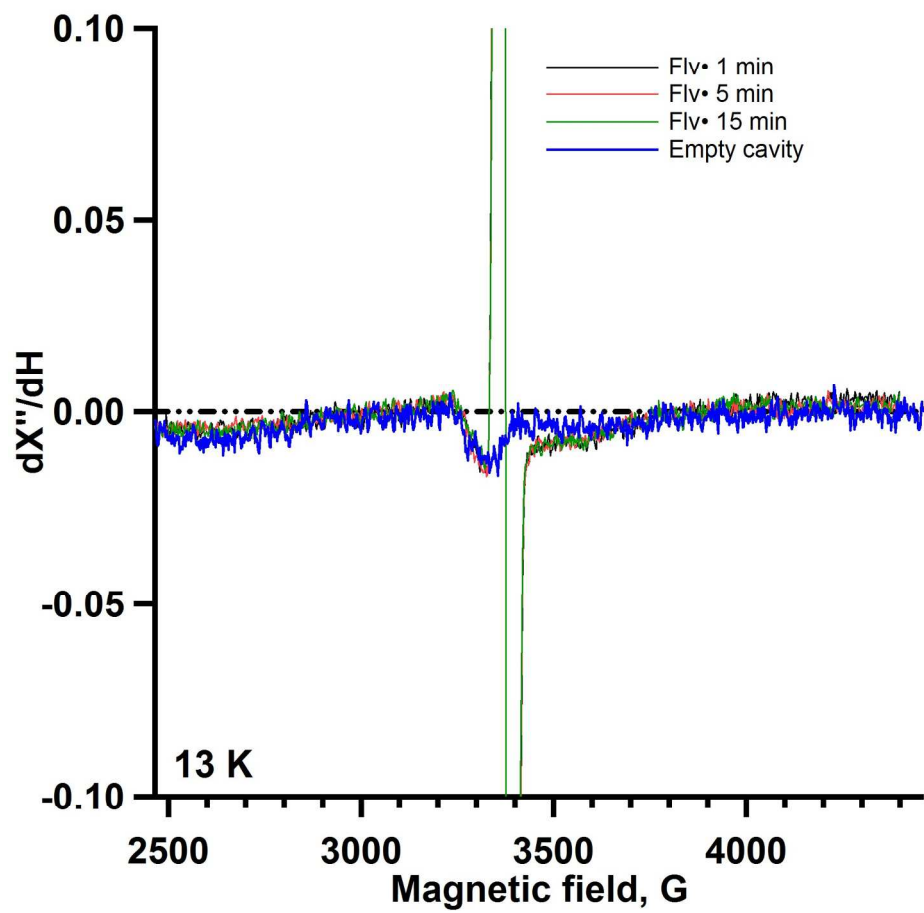

Figure S7.

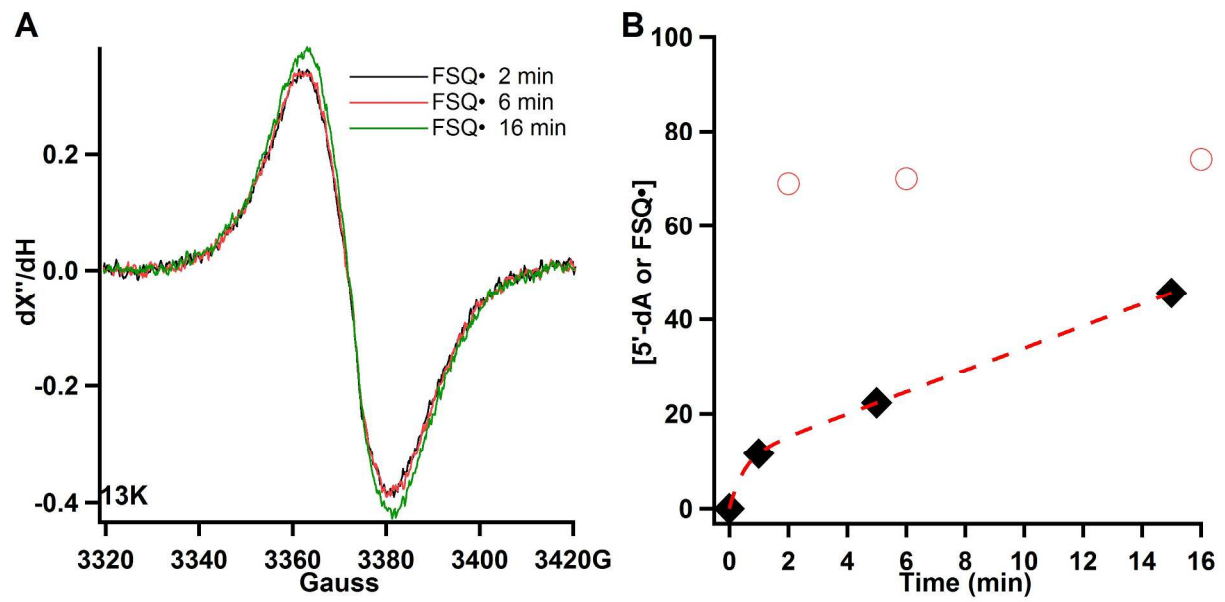

**Figure S8.**

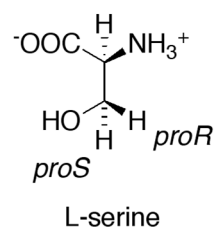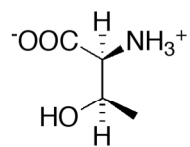

2S,3R  
L-threonine

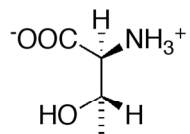

2S,3S  
L-*allo*-threonine

Figure S9.

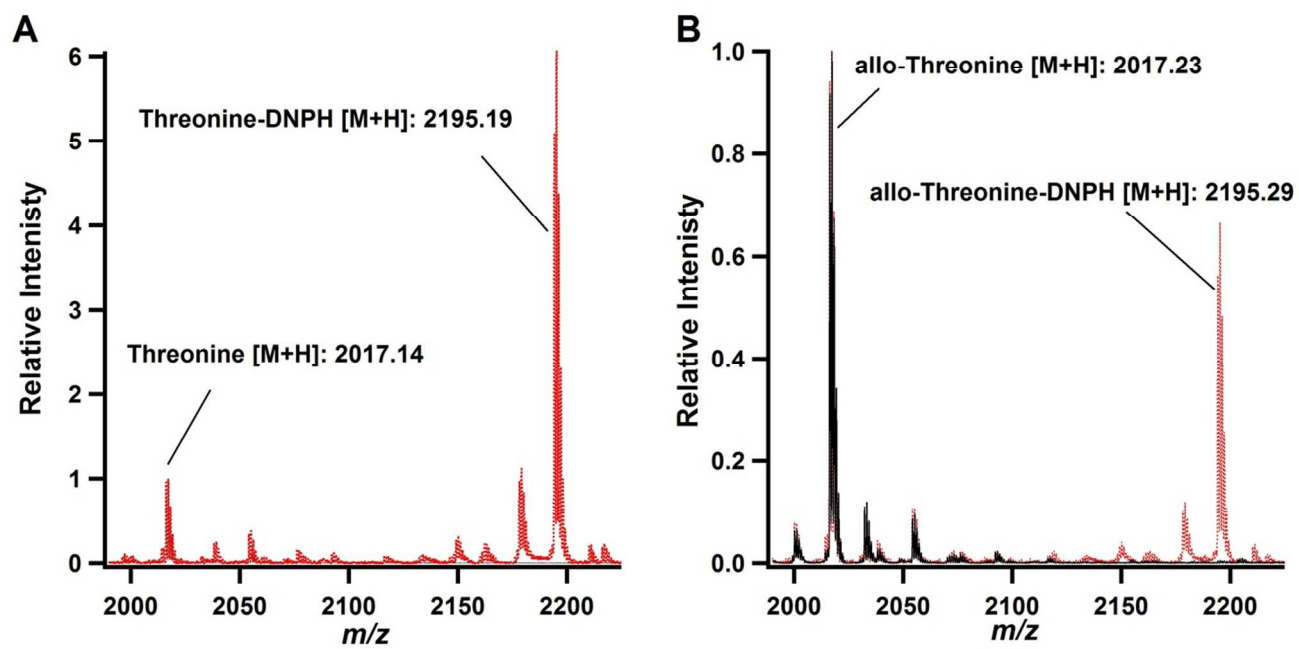

Figure S10.

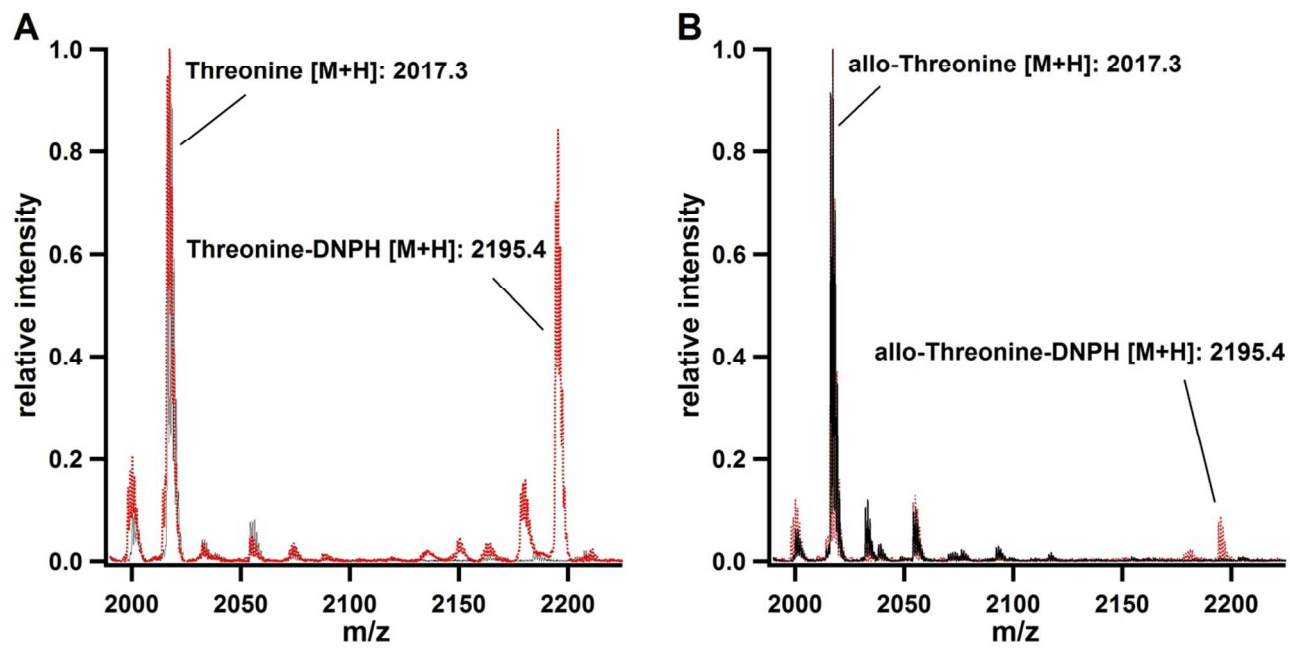

Figure S11.

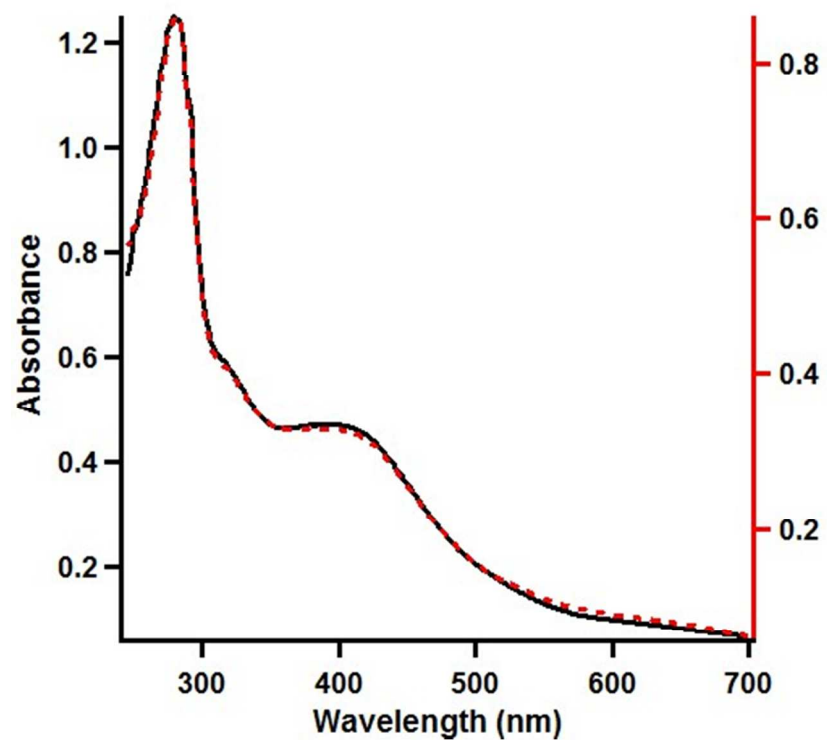



Figure S12.

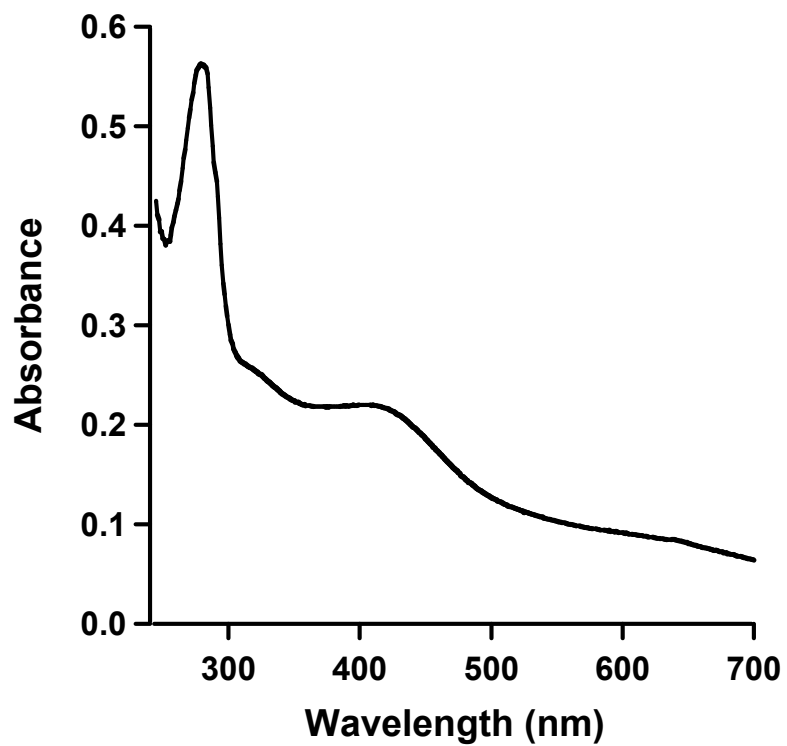

Figure S13

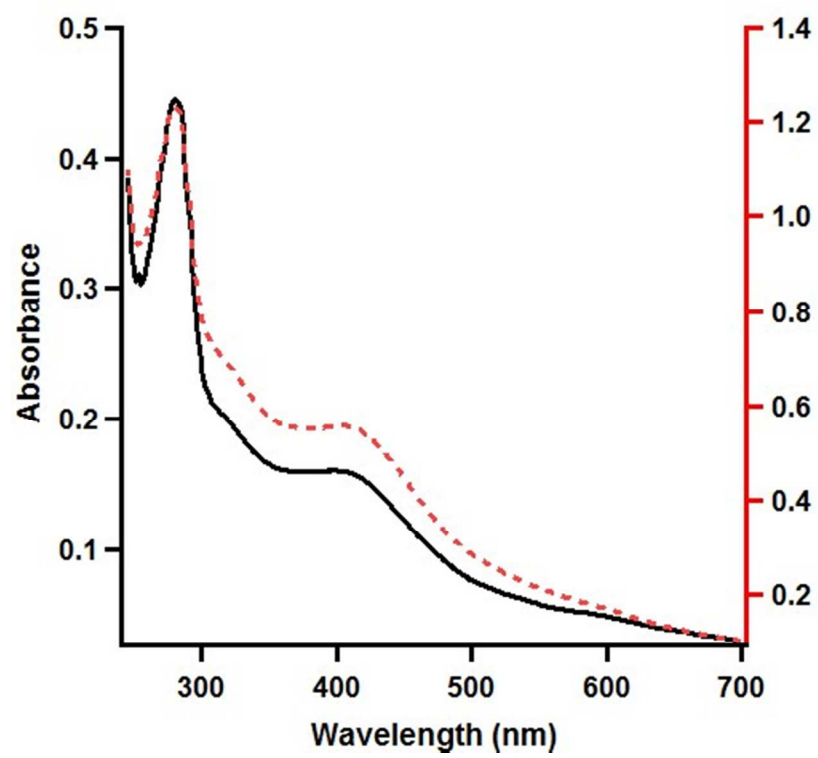

Figure S14.

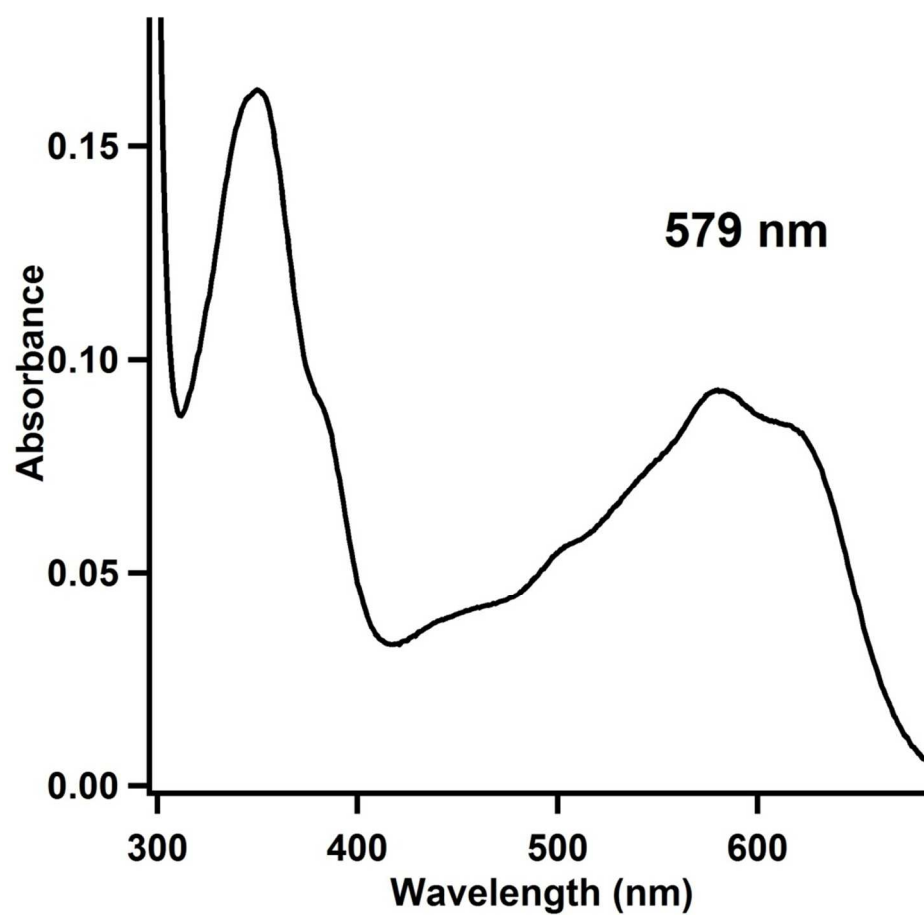

## References

1. Grove, T. L., Lee, K. H., St Clair, J., Krebs, C., and Booker, S. J. (2008) *In vitro* characterization of *AtsB*, a radical SAM formylglycine-generating enzyme that contains three [4Fe-4S] clusters, *Biochemistry* 47, 7523–7538.
